# Supplementary material
Source: PubMed Central journal article supplement (PMC6751392)
Supplement: Supp_Table1.pdf [file Supp_Table1.pdf]

## Supplementary Data

SUPPLEMENTARY TABLE S1. SUMMARY OF TISSUE MICROARRAY DEFINES PERIVASCULAR ANTIGENS BY HISTOLOGIC LOCATION

| <i>Ensg_id</i>  | <i>Gene name</i>   | <i>Location within vascular wall</i> |
|-----------------|--------------------|--------------------------------------|
| ENSG00000277758 | ABC7-42404400C24.1 | Intima                               |
| ENSG00000135776 | ABCB10             | Intima                               |
| ENSG00000131269 | ABCB7              | Intima                               |
| ENSG00000108798 | ABI3               | Intima, media                        |
| ENSG00000213088 | ACKR1              | Intima                               |
| ENSG00000107796 | ACTA2              | Media                                |
| ENSG00000101442 | ACTR5              | Media                                |
| ENSG00000181092 | ADIPOQ             | Intima                               |
| ENSG00000111863 | ADTRP              | Intima                               |
| ENSG00000121057 | AKAP1              | Intima                               |
| ENSG00000182858 | ALG12              | Intima                               |
| ENSG00000198720 | ANKRD13B           | Intima                               |
| ENSG00000276203 | ANKRD20A3          | Intima, adventitia                   |
| ENSG00000167612 | ANKRD33            | Intima, media                        |
| ENSG00000164236 | ANKRD33B           | Intima                               |
| ENSG00000088756 | ARHGAP28           | Intima                               |
| ENSG00000004777 | ARHGAP33           | Media                                |
| ENSG00000099889 | ARVCF              | Media                                |
| ENSG00000058668 | ATP2B4             | Intima                               |
| ENSG00000064270 | ATP2C2             | Intima                               |
| ENSG00000183778 | B3GALT5            | Intima                               |
| ENSG00000156966 | B3GNT7             | Intima                               |
| ENSG00000126581 | BECN1              | Intima                               |
| ENSG00000186470 | BTN3A2             | Media                                |
| ENSG00000174456 | C12orf76           | Intima                               |
| ENSG00000205363 | C15orf59           | Intima                               |
| ENSG00000157181 | C1orf27            | Intima, media                        |
| ENSG00000130349 | C6orf203           | Intima, media                        |
| ENSG00000164500 | C7orf72            | Media                                |
| ENSG00000120159 | CAAP1              | Intima, media, adventitia            |
| ENSG00000122786 | CALD1              | Media                                |
| ENSG00000135387 | CAPRIN1            | Intima, media                        |
| ENSG00000105974 | CAV1               | Intima                               |
| ENSG00000105971 | CAV2               | Intima, media                        |
| ENSG00000150636 | CCDC102B           | Intima                               |
| ENSG00000163081 | CCDC140            | Intima                               |
| ENSG00000170160 | CCDC144A           | Media                                |
| ENSG00000197599 | CCDC154            | Media                                |
| ENSG00000154781 | CCDC174            | Media                                |
| ENSG00000176155 | CCDC57             | Intima, media                        |
| ENSG00000198624 | CCDC69             | Intima                               |
| ENSG00000125810 | CD93               | Intima                               |
| ENSG00000163814 | CDCP1              | Intima                               |
| ENSG00000223510 | CDRT15             | Media                                |
| ENSG00000166582 | CENPV              | Intima, media                        |
| ENSG00000135315 | CEP162             | Intima                               |
| ENSG00000147457 | CHMP7              | Intima, media                        |
| ENSG00000169504 | CLIC4              | Intima                               |
| ENSG00000137392 | CLPS               | Intima                               |
| ENSG00000133313 | CNDP2              | Intima                               |
| ENSG00000130176 | CNN1               | Media                                |
| ENSG00000117519 | CNN3               | Intima, media                        |
| ENSG00000125107 | CNOT1              | Intima, media                        |
| ENSG00000119397 | CNTRL              | Media                                |
| ENSG00000170037 | CNTROB             | Intima, media                        |

(continued)

SUPPLEMENTARY TABLE S1. (CONTINUED)

| <i>Ensg_id</i>  | <i>Gene name</i> | <i>Location within vascular wall</i> |
|-----------------|------------------|--------------------------------------|
| ENSG00000162377 | COA7             | Media                                |
| ENSG00000204291 | COL15A1          | Intima                               |
| ENSG00000134871 | COL4A2           | Intima                               |
| ENSG00000103426 | CORO7-PAM16      | Intima                               |
| ENSG00000182809 | CRIP2            | Intima, media                        |
| ENSG00000175183 | CSRP2            | Media                                |
| ENSG00000269547 | CTC-360G5.8      | Media                                |
| ENSG00000171793 | CTPS1            | Intima, media                        |
| ENSG00000155016 | CYP2U1           | Intima                               |
| ENSG00000198171 | DDRGI1           | Media                                |
| ENSG00000181381 | DDX60L           | Intima                               |
| ENSG00000184276 | DEFB108B         | Media                                |
| ENSG00000105928 | DFNA5            | Intima                               |
| ENSG00000147202 | DIAPH2           | Intima                               |
| ENSG00000198010 | DLGAP2           | Media                                |
| ENSG00000269502 | DMRTC1           | Intima                               |
| ENSG00000150760 | DOCK1            | Intima                               |
| ENSG00000254986 | DPP3             | Intima, media                        |
| ENSG00000188641 | DPYD             | Media                                |
| ENSG00000112679 | DUSP22           | Media                                |
| ENSG00000089091 | DZANK1           | Media                                |
| ENSG00000203965 | EFCAB7           | Intima                               |
| ENSG00000110047 | EHD1             | Intima, adventitia                   |
| ENSG00000115211 | EIF2B4           | Media                                |
| ENSG00000125977 | EIF2S2           | Intima                               |
| ENSG00000164181 | ELOVL7           | Intima                               |
| ENSG00000143924 | EML4             | Intima                               |
| ENSG00000106991 | ENG              | Intima                               |
| ENSG00000068912 | ERLEC1           | Intima                               |
| ENSG00000148468 | FAM171A1         | Intima, media                        |
| ENSG00000135436 | FAM186B          | Media                                |
| ENSG00000214447 | FAM187A          | Media                                |
| ENSG00000144649 | FAM198A          | Intima                               |
| ENSG00000108306 | FBXL20           | Intima                               |
| ENSG00000111790 | FGFR10P2         | Intima, media                        |
| ENSG00000160867 | FGFR4            | Media                                |
| ENSG00000161791 | FMNL3            | Intima                               |
| ENSG00000217128 | FNIP1            | Intima                               |
| ENSG00000075539 | FRYL             | Intima                               |
| ENSG00000105679 | GAPDHS           | Media                                |
| ENSG00000136895 | GARNL3           | Intima                               |
| ENSG00000146013 | GFRA3            | Intima                               |
| ENSG00000100083 | GGA1             | Media                                |
| ENSG00000131067 | GGT7             | Media                                |
| ENSG00000131153 | GINS2            | Media                                |
| ENSG00000159248 | GJD2             | Intima                               |
| ENSG00000139433 | GLTP             | Intima                               |
| ENSG00000114450 | GNB4             | Intima, media                        |
| ENSG00000135677 | GNS              | Intima                               |
| ENSG00000164850 | GPER1            | Intima, media                        |
| ENSG00000177464 | GPR4             | Intima, media                        |
| ENSG00000198932 | GPRASP1          | Intima                               |
| ENSG00000182793 | GSTA5            | Intima                               |
| ENSG00000075218 | GTSE1            | Intima                               |
| ENSG00000061918 | GUCY1B3          | Intima                               |
| ENSG00000165259 | HDX              | Intima                               |
| ENSG00000113845 | HLA-DRA          | Intima                               |
| ENSG00000068097 | HEATR6           | Intima, media                        |
| ENSG00000172987 | HPSE2            | Intima                               |
| ENSG00000157219 | HTR5A            | Intima                               |
| ENSG00000067704 | IARS2            | Intima                               |
| ENSG00000137959 | IFI44L           | Media                                |

(continued)

SUPPLEMENTARY TABLE S1. (CONTINUED)

| <i>Ensg_id</i>  | <i>Gene name</i> | <i>Location within vascular wall</i> |
|-----------------|------------------|--------------------------------------|
| ENSG00000119917 | IFIT3            | Intima                               |
| ENSG00000109083 | IFT20            | Intima, media                        |
| ENSG00000152580 | IGSF10           | Intima                               |
| ENSG00000216588 | IGSF23           | Intima, media                        |
| ENSG00000164880 | INTS1            | Intima, media                        |
| ENSG00000065150 | IPO5             | Intima                               |
| ENSG00000198001 | IRAK4            | Intima, media                        |
| ENSG00000164171 | ITGA2            | Intima                               |
| ENSG00000186994 | KANK3            | Intima                               |
| ENSG00000182359 | KBTBD3           | Media                                |
| ENSG00000120696 | KBTBD7           | Intima                               |
| ENSG00000140015 | KCNH5            | Intima, media                        |
| ENSG00000186795 | KCNK18           | Intima                               |
| ENSG00000198920 | KIAA0753         | Intima, media                        |
| ENSG00000134444 | KIAA1468         | Media                                |
| ENSG00000136883 | KIF12            | Intima, media                        |
| ENSG00000089177 | KIF16B           | Media                                |
| ENSG00000198954 | KIF1BP           | Media                                |
| ENSG00000178502 | KLHL11           | Intima                               |
| ENSG00000135537 | LACE1            | Intima, media                        |
| ENSG00000135338 | LCA5             | Intima                               |
| ENSG00000205629 | LCMT1            | Intima                               |
| ENSG00000189067 | LITAF            | Media                                |
| ENSG00000071282 | LMCD1            | Intima                               |
| ENSG00000163431 | LMOD1            | Media                                |
| ENSG00000154359 | LONRF1           | Intima, media                        |
| ENSG00000132128 | LRRC41           | Intima                               |
| ENSG00000169683 | LRRC45           | Media                                |
| ENSG00000131409 | LRRC4B           | Intima                               |
| ENSG00000171488 | LRRC8C           | Intima                               |
| ENSG00000177363 | LRRN4CL          | Intima                               |
| ENSG00000112799 | LY86             | Intima                               |
| ENSG00000189023 | MAGEB16          | Intima                               |
| ENSG00000186675 | MAGEE2           | Intima, media                        |
| ENSG00000137764 | MAP2K5           | Media                                |
| ENSG00000047849 | MAP4             | Intima, media                        |
| ENSG00000143995 | MEIS1            | Intima                               |
| ENSG00000010165 | METTL13          | Media                                |
| ENSG00000155545 | MIER3            | Intima                               |
| ENSG00000106125 | MINDY4           | Intima                               |
| ENSG00000142606 | MMEL1            | Intima                               |
| ENSG00000156103 | MMP16            | Intima                               |
| ENSG00000116151 | MORN1            | Intima, media                        |
| ENSG00000136522 | MRPL47           | Intima, media                        |
| ENSG00000172590 | MRPL52           | Intima                               |
| ENSG00000175110 | MRPS22           | Intima                               |
| ENSG00000128654 | MTX2             | Media                                |
| ENSG00000133392 | MYH11            | Media                                |
| ENSG00000100345 | MYH9             | Intima                               |
| ENSG00000101608 | MYL12A           | Intima, media                        |
| ENSG00000111245 | MYL2             | Intima, media                        |
| ENSG00000101335 | MYL9             | Intima, media                        |
| ENSG00000145555 | MYO10            | Intima                               |
| ENSG00000197879 | MYO1C            | Intima                               |
| ENSG00000066933 | MYO9A            | Intima                               |
| ENSG00000161048 | NAPEPLD          | Intima                               |
| ENSG00000160796 | NBEAL2           | Intima                               |
| ENSG00000188554 | NBR1             | Intima                               |
| ENSG00000136098 | NEK3             | Intima                               |
| ENSG00000132688 | NES              | Intima                               |
| ENSG00000173848 | NET1             | Media                                |
| ENSG00000215041 | NEURL4           | Media                                |

(continued)

SUPPLEMENTARY TABLE S1. (CONTINUED)

| <i>Ensg_id</i>  | <i>Gene name</i> | <i>Location within vascular wall</i> |
|-----------------|------------------|--------------------------------------|
| ENSG00000100968 | NFATC4           | Intima, media                        |
| ENSG00000164190 | NIPBL            | Intima                               |
| ENSG00000148572 | NRBF2            | Intima                               |
| ENSG00000169189 | NSMCE1           | Intima, media                        |
| ENSG00000120526 | NUDCD1           | Media                                |
| ENSG00000122417 | ODF2L            | Media                                |
| ENSG00000183034 | OTOP2            | Intima                               |
| ENSG00000280789 | PAGR1            | Intima                               |
| ENSG00000099260 | PALMD            | Intima                               |
| ENSG00000132849 | PATJ             | Intima, media                        |
| ENSG00000177425 | PAWR             | Media                                |
| ENSG00000163939 | PBRM1            | Intima                               |
| ENSG00000126226 | PCID2            | Media                                |
| ENSG00000136940 | PDCL             | Intima, media                        |
| ENSG00000186642 | PDE2A            | Intima                               |
| ENSG00000065485 | PDIA5            | Intima                               |
| ENSG00000114268 | PFKFB4           | Media                                |
| ENSG00000185220 | PGBD2            | Intima                               |
| ENSG00000079739 | PGM1             | Media                                |
| ENSG00000165195 | PIGA             | Media                                |
| ENSG00000119227 | PIGZ             | Media                                |
| ENSG00000078142 | PIK3C3           | Intima                               |
| ENSG00000186111 | PIP5K1C          | Media                                |
| ENSG00000241878 | PISD             | Media                                |
| ENSG00000107959 | PITRM1           | Media                                |
| ENSG00000103066 | PLA2G15          | Intima                               |
| ENSG00000115556 | PLCD4            | Media                                |
| ENSG00000178209 | PLEC             | Intima                               |
| ENSG00000198523 | PLN              | Media                                |
| ENSG00000189266 | PNRC2            | Intima, media                        |
| ENSG00000185250 | PPIL6            | Intima                               |
| ENSG00000148840 | PPRC1            | Intima, media                        |
| ENSG00000128563 | PRKRIP1          | Intima                               |
| ENSG00000008018 | PSMB1            | Intima                               |
| ENSG00000277791 | PSMB3            | Media                                |
| ENSG00000173692 | PSMD1            | Intima                               |
| ENSG00000169398 | PTK2             | Intima, media                        |
| ENSG00000177469 | PTRF             | Intima                               |
| ENSG00000170473 | PYM1             | Media                                |
| ENSG00000213339 | QTRT1            | Intima, media                        |
| ENSG00000103769 | RAB11A           | Media                                |
| ENSG00000029725 | RABEP1           | Media                                |
| ENSG00000144134 | RABL2A           | Intima, media                        |
| ENSG00000204764 | RANBP17          | Intima, media                        |
| ENSG00000139547 | RDH16            | Media, adventitia                    |
| ENSG00000143344 | RGL1             | Media                                |
| ENSG00000128482 | RNF112           | Intima                               |
| ENSG00000141576 | RNF157           | Intima, media                        |
| ENSG00000120925 | RNF170           | Media                                |
| ENSG00000169855 | ROBO1            | Media                                |
| ENSG00000179673 | RPRML            | Intima                               |
| ENSG00000137154 | RPS6             | Intima                               |
| ENSG00000196154 | S100A4           | Intima                               |
| ENSG00000123453 | SARDH            | Media                                |
| ENSG00000133812 | SBF2             | Intima                               |
| ENSG00000198832 | SELENOM          | Media                                |
| ENSG00000122545 | Septin 7         | Intima                               |
| ENSG00000142864 | SERBP1           | Intima, media                        |
| ENSG00000187902 | SHISA7           | Intima, media                        |
| ENSG00000170085 | SIMC1            | Intima, media                        |
| ENSG00000158296 | SLC13A3          | Media                                |
| ENSG00000172940 | SLC22A13         | Intima, media                        |

(continued)

SUPPLEMENTARY TABLE S1. (CONTINUED)

| <i>Ensg_id</i>  | <i>Gene name</i> | <i>Location within vascular wall</i> |
|-----------------|------------------|--------------------------------------|
| ENSG00000163393 | SLC22A15         | Intima                               |
| ENSG00000100372 | SLC25A17         | Intima, media                        |
| ENSG00000145832 | SLC25A48         | Intima                               |
| ENSG00000146411 | SLC2A12          | Media                                |
| ENSG00000162695 | SLC30A7          | Intima, media                        |
| ENSG00000160190 | SLC37A1          | Media                                |
| ENSG00000137968 | SLC44A5          | Media                                |
| ENSG00000065054 | SLC9A3R2         | Intima                               |
| ENSG00000183963 | SMTN             | Media                                |
| ENSG00000185420 | SMYD3            | Intima                               |
| ENSG00000173267 | SNCG             | Intima, media                        |
| ENSG00000006282 | SPATA20          | Intima                               |
| ENSG00000160284 | SPATC1L          | Media                                |
| ENSG00000104133 | SPG11            | Intima                               |
| ENSG00000164808 | SPIDR            | Media                                |
| ENSG00000115525 | ST3GAL5          | Intima                               |
| ENSG00000064225 | ST3GAL6          | Intima, media                        |
| ENSG00000166263 | STXBP4           | Intima                               |
| ENSG00000172340 | SUCLG2           | Intima                               |
| ENSG00000175600 | SUGCT            | Intima, media                        |
| ENSG00000198168 | SVIP             | Intima, media                        |
| ENSG00000116668 | SWT1             | Intima, media                        |
| ENSG00000182253 | SYNM             | Media                                |
| ENSG00000149591 | TAGLN            | Intima                               |
| ENSG00000136560 | TANK             | Intima                               |
| ENSG00000221855 | TAS2R41          | Media                                |
| ENSG00000167202 | TBC1D2B          | Intima                               |
| ENSG00000198933 | TBKBP1           | Intima                               |
| ENSG00000092377 | TBL1Y            | Media                                |
| ENSG00000152760 | TCTEX1D1         | Intima                               |
| ENSG00000099797 | TECR             | Media                                |
| ENSG00000149256 | TENM4            | Media                                |
| ENSG00000152291 | TGOLN2           | Media                                |
| ENSG00000265354 | TIMM23           | Intima, media                        |
| ENSG00000113845 | TIMMDC1          | Intima                               |
| ENSG00000142910 | TINAGL1          | Media                                |
| ENSG00000137221 | TJAP1            | Intima                               |
| ENSG00000170537 | TMC7             | Intima, media                        |
| ENSG00000166575 | TMEM135          | Intima                               |
| ENSG00000175606 | TMEM70           | Intima                               |
| ENSG00000178297 | TMPRSS9          | Intima                               |
| ENSG00000145779 | TNFAIP8          | Intima                               |
| ENSG00000120332 | TNN              | Media                                |
| ENSG00000116147 | TNR              | Media, adventitia                    |
| ENSG00000140416 | TPM1             | Intima, media                        |
| ENSG00000198467 | TPM2             | Intima                               |
| ENSG00000107614 | TRDMT1           | Media                                |
| ENSG00000144015 | TRIM43           | Intima, media                        |
| ENSG00000183718 | TRIM52           | Intima                               |
| ENSG00000169871 | TRIM56           | Intima, media                        |
| ENSG00000165699 | TSC1             | Media                                |
| ENSG00000116918 | TSNAX            | Media                                |
| ENSG00000005379 | TSPOAP1          | Intima                               |
| ENSG00000119685 | TTLL5            | Intima, media                        |
| ENSG00000108106 | UBE2S            | Media                                |
| ENSG00000143222 | UFC1             | Media                                |
| ENSG00000070010 | UFD1L            | Intima                               |
| ENSG00000124602 | UNC5CL           | Media                                |
| ENSG00000006715 | VPS41            | Media                                |
| ENSG00000165633 | VSTM4            | Intima, media                        |
| ENSG00000102763 | VWA8             | Media                                |
| ENSG00000146530 | VWDE             | Intima                               |

(continued)

SUPPLEMENTARY TABLE S1. (CONTINUED)

| <i>Ensg_id</i>  | <i>Gene name</i> | <i>Location within vascular wall</i> |
|-----------------|------------------|--------------------------------------|
| ENSG00000110799 | VWF              | Intima                               |
| ENSG00000120860 | WASHC3           | Intima                               |
| ENSG00000165171 | WBSCR27          | Media                                |
| ENSG00000047056 | WDR37            | Intima, adventitia                   |
| ENSG00000135925 | WNT10A           | Intima                               |
| ENSG00000164171 | XCR1             | Intima                               |
| ENSG00000137693 | YAP1             | Intima                               |
| ENSG00000163872 | YEATS2           | Intima, media                        |
| ENSG00000236287 | ZBED5            | Media                                |
| ENSG00000123200 | ZC3H13           | Intima, media                        |
| ENSG00000134744 | ZCCHC11          | Media                                |
| ENSG00000172671 | ZFAND4           | Intima                               |
| ENSG00000184939 | ZFP90            | Intima                               |
| ENSG00000138658 | ZGRF1            | Intima                               |
| ENSG00000167384 | ZNF180           | Media                                |
| ENSG00000090612 | ZNF268           | Intima                               |
| ENSG00000131845 | ZNF304           | Intima                               |
| ENSG00000182986 | ZNF320           | Media                                |
| ENSG00000188033 | ZNF490           | Intima                               |
| ENSG00000188171 | ZNF626           | Media                                |
| ENSG00000197343 | ZNF655           | Intima                               |
| ENSG00000156853 | ZNF689           | Intima                               |
| ENSG00000164684 | ZNF704           | Intima, media                        |
| ENSG00000197362 | ZNF786           | Intima                               |

List of 328 proteins consistently and specifically expressed within different layers of the vessel wall in normal adult human adipose tissue, including the *tunica intima*, *media*, and *adventitia* (see also Fig. 3A). The antigens are specific to the *tunica intima* and are then further categorized by their subcellular location.
