# Supplementary material
Source: PubMed Central journal article supplement (PMC6751392)
Supplement: Supp_Table2.pdf [file Supp_Table2.pdf]

SUPPLEMENTARY TABLE S2. LIST OF ANTIGENS CONSISTENTLY AND SPECIFICALLY EXPRESSED WITHIN  
*TUNICA INTIMA* OF VESSEL WALLS IN NORMAL ADULT HUMAN ADIPOSE TISSUE WITHIN THE HUMAN PROTEIN ATLAS

| <i>Ensg_id</i>    | <i>Gene name</i>    | <i>Location within vascular wall</i> | <i>Subcellular location</i>               |
|-------------------|---------------------|--------------------------------------|-------------------------------------------|
| ENSG00000 277758  | ABC7-42404400 C24.1 | Intima                               | Intracellular, membrane protein           |
| ENSG00000 135776  | ABCB10              | Intima                               | Membrane protein                          |
| ENSG00000 131269  | ABCB7               | Intima                               | Intracellular, membrane protein           |
| ENSG00000 108798  | ABI3                | Intima, media                        | Intracellular protein                     |
| ENSG00000 213088  | ACKR1               | Intima                               | Membrane protein                          |
| ENSG00000 181092  | ADIPOQ              | Intima                               | Secreted protein                          |
| ENSG00000 111863  | ADTRP               | Intima                               | Membrane protein                          |
| ENSG00000 121057  | AKAP1               | Intima                               | Intracellular, membrane protein           |
| ENSG00000 182858  | ALG12               | Intima                               | Membrane protein                          |
| ENSG00000 198720  | ANKRD13B            | Intima                               | Intracellular protein                     |
| ENSG00000 167612  | ANKRD33             | Intima, media                        | Intracellular protein                     |
| ENSG00000 164236  | ANKRD33B            | Intima                               | Intracellular protein                     |
| ENSG00000 088756  | ARHGAP28            | Intima                               | Intracellular protein                     |
| ENSG00000 058668  | ATP2B4              | Intima                               | Intracellular, membrane protein           |
| ENSG000000 64270  | ATP2C2              | Intima                               | Membrane protein                          |
| ENSG00000 183778  | B3GALT5             | Intima                               | Intracellular, secreted protein           |
| ENSG00000 156966  | B3GNT7              | Intima                               | Secreted protein                          |
| ENSG00000 126581  | BECN1               | Intima                               | Intracellular protein                     |
| ENSG00000 174456  | C12orf76            | Intima                               | Intracellular, secreted, membrane protein |
| ENSG00000 205363  | C15orf59            | Intima                               | Intracellular protein                     |
| ENSG00000 157181  | C1orf27             | Intima, media                        | Membrane protein                          |
| ENSG00000 130349  | C6orf203            | Intima, media                        | Intracellular protein                     |
| ENSG00000 135387  | CAPRIN1             | Intima, media                        | Intracellular protein                     |
| ENSG00000 105974  | CAV1                | Intima                               | Membrane protein                          |
| ENSG00000 105971  | CAV2                | Intima, media                        | Intracellular, membrane protein           |
| ENSG00000 150636  | CCDC102B            | Intima                               | Intracellular protein                     |
| ENSG00000 163081  | CCDC140             | Intima                               | Intracellular protein                     |
| ENSG00000 176155  | CCDC57              | Intima, media                        | Intracellular protein                     |
| ENSG00000 125810  | CD93                | Intima                               | Membrane protein                          |
| ENSG00000 183034  | CDCP1               | Intima                               | Membrane protein                          |
| ENSG00000 166582  | CENPV               | Intima, media                        | Intracellular protein                     |
| ENSG00000 135315  | CEP162              | Intima                               | Intracellular protein                     |
| ENSG00000 147457  | CHMP7               | Intima, media                        | Intracellular protein                     |
| ENSG00000 169504  | CLIC4               | Intima                               | Intracellular protein                     |
| ENSG00000 137392  | CLPS                | Intima                               | Intracellular, secreted protein           |
| ENSG00000 133313  | CNDP2               | Intima                               | Intracellular protein                     |
| ENSG00000 117519  | CNN3                | Intima, media                        | Intracellular protein                     |
| ENSG00000 125107  | CNOT1               | Intima, media                        | Intracellular, membrane protein           |
| ENSG00000 170037  | CNTROB              | Intima, media                        | Intracellular protein                     |
| ENSG00000 204291  | COL15A1             | Intima                               | Secreted protein                          |
| ENSG00000 0134871 | COL4A2              | Intima                               | Intracellular protein                     |
| ENSG00000 103426  | CORO7-PAM16         | Intima                               | Intracellular protein                     |
| ENSG00000 182809  | CRIP2               | Intima, media                        | Intracellular protein                     |
| ENSG00000 171793  | CTPS1               | Intima, media                        | Intracellular protein                     |
| ENSG00000 155016  | CYP2U1              | Intima                               | Membrane protein                          |
| ENSG00000 181381  | DDX60L              | Intima                               | Intracellular protein                     |
| ENSG00000 105928  | DFNA5               | Intima                               | Intracellular, secreted protein           |
| ENSG00000 147202  | DIAPH2              | Intima                               | Intracellular protein                     |
| ENSG00000 269502  | DMRTC1              | Intima                               | Intracellular protein                     |
| ENSG00000 150760  | DOCK1               | Intima                               | Intracellular protein                     |
| ENSG00000 254986  | DPP3                | Intima, media                        | Intracellular protein                     |
| ENSG00000 203965  | EFCAB7              | Intima                               | Intracellular protein                     |
| ENSG00000 110047  | EHD1                | Intima, adventitia                   | Intracellular protein                     |
| ENSG00000 125977  | EIF2S2              | Intima                               | Intracellular protein                     |
| ENSG00000 164181  | ELOVL7              | Intima                               | Membrane protein                          |
| ENSG00000 143924  | EML4                | Intima                               | Intracellular protein                     |
| ENSG00000 106991  | ENG                 | Intima                               | Membrane protein                          |
| ENSG00000 068912  | ERLEC1              | Intima                               | Secreted protein                          |
| ENSG00000 148468  | FAM171A1            | Intima, media                        | Membrane, secreted protein                |
| ENSG00000 144649  | FAM198A             | Intima                               | Intracellular, secreted protein           |

(continued)

SUPPLEMENTARY TABLE S2. (CONTINUED)

| <i>Ensg_id</i>  | <i>Gene name</i> | <i>Location within vascular wall</i> | <i>Subcellular location</i>     |
|-----------------|------------------|--------------------------------------|---------------------------------|
| ENSG00000108306 | FBXL20           | Intima                               | Intracellular protein           |
| ENSG00000111790 | FGFR10P2         | Intima, media                        | Intracellular protein           |
| ENSG00000161791 | FMNL3            | Intima                               | Intracellular protein           |
| ENSG00000217128 | FNIP1            | Intima                               | Intracellular protein           |
| ENSG00000075539 | FRYL             | Intima                               | Intracellular protein           |
| ENSG00000136895 | GARNL3           | Intima                               | Intracellular protein           |
| ENSG00000146013 | GFRA3            | Intima                               | Membrane protein                |
| ENSG00000159248 | GJD2             | Intima                               | Membrane protein                |
| ENSG00000139433 | GLTP             | Intima                               | Intracellular protein           |
| ENSG00000114450 | GNB4             | Intima, media                        | Intracellular protein           |
| ENSG00000135677 | GNS              | Intima                               | Intracellular, secreted protein |
| ENSG00000164850 | GPB1             | Intima, media                        | Intracellular protein           |
| ENSG00000177464 | GPR4             | Intima, media                        | Membrane protein                |
| ENSG00000198932 | GPRASP1          | Intima                               | Intracellular protein           |
| ENSG00000182793 | GSTA5            | Intima                               | Intracellular protein           |
| ENSG00000075218 | GTSE1            | Intima                               | Intracellular protein           |
| ENSG00000061918 | GUCY1B3          | Intima                               | Intracellular protein           |
| ENSG00000165259 | HDX              | Intima                               | Intracellular protein           |
| ENSG00000068097 | HEATR6           | Intima, media                        | Intracellular protein           |
| ENSG00000113845 | HLA-DRA          | Intima                               | Membrane, secreted protein      |
| ENSG00000172987 | HPSE2            | Intima                               | Intracellular, secreted protein |
| ENSG00000157219 | HTR5A            | Intima                               | Membrane protein                |
| ENSG00000067704 | IARS2            | Intima                               | Intracellular protein           |
| ENSG00000119917 | IFIT3            | Intima                               | Intracellular protein           |
| ENSG00000109083 | IFT20            | Intima, media                        | Intracellular protein           |
| ENSG00000152580 | IGSF10           | Intima                               | Intracellular, secreted protein |
| ENSG00000216588 | IGSF23           | Intima, media                        | Intracellular, membrane protein |
| ENSG00000164880 | INTS1            | Intima, media                        | Intracellular, membrane protein |
| ENSG00000065150 | IPO5             | Intima                               | Intracellular protein           |
| ENSG00000198001 | IRAK4            | Intima, media                        | Intracellular protein           |
| ENSG00000164171 | ITGA2            | Intima                               | Membrane protein                |
| ENSG00000186994 | KANK3            | Intima                               | Intracellular protein           |
| ENSG00000120696 | KBTBD7           | Intima                               | Intracellular protein           |
| ENSG00000140015 | KCNH5            | Intima, media                        | Membrane protein                |
| ENSG00000186795 | KCNK18           | Intima                               | Membrane protein                |
| ENSG00000198920 | KIAA0753         | Intima, media                        | Intracellular protein           |
| ENSG00000136883 | KIF12            | Intima, media                        | Intracellular protein           |
| ENSG00000178502 | KLHL11           | Intima                               | Secreted protein                |
| ENSG00000135537 | LACE1            | Intima, media                        | Intracellular, secreted protein |
| ENSG00000135338 | LCA5             | Intima                               | Intracellular protein           |
| ENSG00000205629 | LCMT1            | Intima                               | Intracellular protein           |
| ENSG00000071282 | LMCD1            | Intima                               | Intracellular protein           |
| ENSG00000154359 | LONRF1           | Intima, media                        | Intracellular protein           |
| ENSG00000132128 | LRRC41           | Intima                               | Intracellular protein           |
| ENSG00000131409 | LRRC4B           | Intima                               | Membrane, secreted protein      |
| ENSG00000171488 | LRRC8C           | Intima                               | Membrane protein                |
| ENSG00000177363 | LRRN4CL          | Intima                               | Membrane protein                |
| ENSG00000112799 | LY86             | Intima                               | Secreted protein                |
| ENSG00000189023 | MAGEB16          | Intima                               | Intracellular protein           |
| ENSG00000186675 | MAGEE2           | Intima, media                        | Intracellular protein           |
| ENSG00000047849 | MAP4             | Intima, media                        | Intracellular protein           |
| ENSG00000143995 | MEIS1            | Intima                               | Intracellular, secreted protein |
| ENSG00000155545 | MIER3            | Intima                               | Intracellular protein           |
| ENSG00000106125 | MINDY4           | Intima                               | Intracellular protein           |
| ENSG00000142606 | MMEL1            | Intima                               | Intracellular protein           |
| ENSG00000156103 | MMP16            | Intima                               | Intracellular, membrane protein |
| ENSG00000116151 | MORN1            | Intima, media                        | Intracellular protein           |
| ENSG00000136522 | MRPL47           | Intima, media                        | Intracellular protein           |
| ENSG00000172590 | MRPL52           | Intima                               | Intracellular, secreted protein |
| ENSG00000175110 | MRPS22           | Intima                               | Intracellular, secreted protein |
| ENSG00000100345 | MYH9             | Intima                               | Intracellular protein           |

(continued)

SUPPLEMENTARY TABLE S2. (CONTINUED)

| <i>Ensg_id</i>   | <i>Gene name</i> | <i>Location within vascular wall</i> | <i>Subcellular location</i>               |
|------------------|------------------|--------------------------------------|-------------------------------------------|
| ENSG00000101608  | MYL12A           | Intima, media                        | Intracellular protein                     |
| ENSG00000111245  | MYL2             | Intima, media                        | Intracellular protein                     |
| ENSG00000101335  | MYL9             | Intima, media                        | Intracellular protein                     |
| ENSG00000145555  | MYO10            | Intima                               | Intracellular protein                     |
| ENSG00000197879  | MYO1C            | Intima                               | Intracellular protein                     |
| ENSG00000066933  | MYO9A            | Intima                               | Intracellular protein                     |
| ENSG00000161048  | NAPEPLD          | Intima                               | Intracellular protein                     |
| ENSG00000160796  | NBEAL2           | Intima                               | Intracellular protein                     |
| ENSG00000188554  | NBR1             | Intima                               | Intracellular protein                     |
| ENSG00000136098  | NEK3             | Intima                               | Intracellular protein                     |
| ENSG00000132688  | NES              | Intima                               | Intracellular protein                     |
| ENSG00000100968  | NFATC4           | Intima, media                        | Intracellular protein                     |
| ENSG00000164190  | NIPBL            | Intima                               | Intracellular protein                     |
| ENSG00000148572  | NRBF2            | Intima                               | Intracellular protein                     |
| ENSG00000183034  | OTOP2            | Intima                               | Membrane protein                          |
| ENSG000001280789 | PAGR1            | Intima                               | Intracellular protein                     |
| ENSG000001099260 | PALMD            | Intima                               | Intracellular protein                     |
| ENSG00000132849  | PATJ             | Intima, media                        | Intracellular protein                     |
| ENSG00000163939  | PBRM1            | Intima                               | Intracellular protein                     |
| ENSG00000136940  | PDCL             | Intima, media                        | Intracellular protein                     |
| ENSG00000186642  | PDE2A            | Intima                               | Intracellular, secreted protein           |
| ENSG000001065485 | PDIA5            | Intima                               | Intracellular, secreted protein           |
| ENSG00000185220  | PGBD2            | Intima                               | Intracellular protein                     |
| ENSG000001078142 | PIK3C3           | Intima                               | Intracellular protein                     |
| ENSG00000103066  | PLA2G15          | Intima                               | Membrane, secreted protein                |
| ENSG00000115556  | PLCD4            | Intima, adventitia                   | Intracellular protein                     |
| ENSG00000178209  | PLEC             | Intima                               | Intracellular protein                     |
| ENSG00000189266  | PNRC2            | Intima, media                        | Intracellular protein                     |
| ENSG00000185250  | PPIL6            | Intima                               | Intracellular protein                     |
| ENSG00000148840  | PPRC1            | Intima, media                        | Intracellular protein                     |
| ENSG00000128563  | PRKRIP1          | Intima                               | Intracellular protein                     |
| ENSG000001008018 | PSMB1            | Intima                               | Intracellular protein                     |
| ENSG00000173692  | PSMD1            | Intima                               | Intracellular, secreted, membrane protein |
| ENSG00000169398  | PTK2             | Intima, media                        | Intracellular protein                     |
| ENSG00000177469  | PTRF             | Intima                               | Intracellular protein                     |
| ENSG000001213339 | QTRT1            | Intima, media                        | Intracellular protein                     |
| ENSG00000144134  | RABL2A           | Intima, media                        | Intracellular protein                     |
| ENSG000001204764 | RANBP17          | Intima, media                        | Intracellular, membrane protein           |
| ENSG00000140015  | RDH16            | Intima, media                        | Membrane protein                          |
| ENSG00000128482  | RNF112           | Intima                               | Intracellular, membrane protein           |
| ENSG00000141576  | RNF157           | Intima, media                        | Intracellular protein                     |
| ENSG00000179673  | RPRML            | Intima                               | Membrane protein                          |
| ENSG00000137154  | RPS6             | Intima                               | Intracellular protein                     |
| ENSG00000196154  | S100A4           | Intima                               | Intracellular protein                     |
| ENSG00000133812  | SBF2             | Intima                               | Intracellular protein                     |
| ENSG00000122545  | Septin 7         | Intima                               | Intracellular protein                     |
| ENSG00000142864  | SERBP1           | Intima, media                        | Intracellular protein                     |
| ENSG00000187902  | SHISA7           | Intima, media                        | Membrane protein                          |
| ENSG00000170085  | SIMC1            | Intima, media                        | Intracellular protein                     |
| ENSG00000172940  | SLC22A13         | Intima, media                        | Membrane protein                          |
| ENSG00000163393  | SLC22A15         | Intima                               | Membrane protein                          |
| ENSG00000100372  | SLC25A17         | Intima, media                        | Intracellular protein                     |
| ENSG00000145832  | SLC25A48         | Intima                               | Intracellular, membrane protein           |
| ENSG00000162695  | SLC30A7          | Intima, media                        | Intracellular, membrane protein           |
| ENSG000001065054 | SLC9A3R2         | Intima                               | Intracellular protein                     |
| ENSG00000185420  | SMYD3            | Intima                               | Intracellular protein                     |
| ENSG00000173267  | SNCG             | Intima, media                        | Intracellular protein                     |
| ENSG000001006282 | SPATA20          | Intima                               | Intracellular protein                     |
| ENSG00000104133  | SPG11            | Intima                               | Intracellular, membrane protein           |
| ENSG00000115525  | ST3GAL5          | Intima                               | Intracellular, membrane protein           |
| ENSG000001064225 | ST3GAL6          | Intima, media                        | Intracellular, membrane protein           |

(continued)

SUPPLEMENTARY TABLE S2. (CONTINUED)

| <i>Ensg_id</i>  | <i>Gene name</i> | <i>Location within vascular wall</i> | <i>Subcellular location</i>     |
|-----------------|------------------|--------------------------------------|---------------------------------|
| ENSG00000166263 | STXBP4           | Intima                               | Intracellular protein           |
| ENSG00000172340 | SUCLG2           | Intima                               | Intracellular protein           |
| ENSG00000175600 | SUGCT            | Intima, media                        | Intracellular protein           |
| ENSG00000198168 | SVIP             | Intima, media                        | Intracellular protein           |
| ENSG00000116668 | SWT1             | Intima, media                        | Intracellular protein           |
| ENSG00000149591 | TAGLN            | Intima                               | Intracellular protein           |
| ENSG00000136560 | TANK             | Intima                               | Intracellular protein           |
| ENSG00000167202 | TBC1D2B          | Intima                               | Intracellular, membrane protein |
| ENSG00000198933 | TBKBP1           | Intima                               | Intracellular protein           |
| ENSG00000152760 | TCTEX1D1         | Intima                               | Intracellular protein           |
| ENSG00000265354 | TIMM23           | Intima, media                        | Membrane protein                |
| ENSG00000113845 | TIMMDC1          | Intima                               | Membrane, secreted protein      |
| ENSG00000137221 | TJAP1            | Intima                               | Intracellular protein           |
| ENSG00000170537 | TMC7             | Intima, media                        | Membrane protein                |
| ENSG00000166575 | TMEM135          | Intima                               | Membrane protein                |
| ENSG00000175606 | TMEM70           | Intima                               | Membrane, secreted protein      |
| ENSG00000178297 | TMPRSS9          | Intima                               | Membrane protein                |
| ENSG00000145779 | TNFAIP8          | Intima                               | Intracellular protein           |
| ENSG00000140416 | TPM1             | Intima, media                        | Intracellular, membrane protein |
| ENSG00000198467 | TPM2             | Intima                               | Intracellular protein           |
| ENSG00000107614 | TRDMT1           | Intima                               | Intracellular protein           |
| ENSG00000144015 | TRIM43           | Intima, media                        | Intracellular protein           |
| ENSG00000183718 | TRIM52           | Intima                               | Intracellular protein           |
| ENSG00000169871 | TRIM56           | Intima, media                        | Intracellular protein           |
| ENSG00000005379 | TSPOAP1          | Intima                               | Intracellular protein           |
| ENSG00000119685 | TTLL5            | Intima, media                        | Intracellular protein           |
| ENSG00000070010 | UFD1L            | Intima                               | Intracellular protein           |
| ENSG00000165633 | VSTM4            | Intima, media                        | Membrane, secreted protein      |
| ENSG00000146530 | VWDE             | Intima                               | Intracellular, secreted protein |
| ENSG00000110799 | VWF              | Intima                               | Secreted protein                |
| ENSG00000120860 | WASHC3           | Intima                               | Intracellular protein           |
| ENSG00000047056 | WDR37            | Intima, adventitia                   | Intracellular protein           |
| ENSG00000135925 | WNT10A           | Intima                               | Intracellular, membrane protein |
| ENSG00000137693 | YAP1             | Intima                               | Intracellular protein           |
| ENSG00000163872 | YEATS2           | Intima, media                        | Intracellular protein           |
| ENSG00000123200 | ZC3H13           | Intima, media                        | Intracellular protein           |
| ENSG00000172671 | ZFAND4           | Intima                               | Intracellular protein           |
| ENSG00000184939 | ZFP90            | Intima, adventitia                   | Intracellular protein           |
| ENSG00000138658 | ZGRF1            | Intima                               | Intracellular protein           |
| ENSG00000090612 | ZNF268           | Intima                               | Intracellular protein           |
| ENSG00000131845 | ZNF304           | Intima                               | Intracellular protein           |
| ENSG00000188033 | ZNF490           | Intima                               | Intracellular protein           |
| ENSG00000197343 | ZNF655           | Intima                               | Intracellular protein           |
| ENSG00000156853 | ZNF689           | Intima                               | Intracellular protein           |
| ENSG00000164684 | ZNF704           | Intima, media                        | Intracellular protein           |
| ENSG00000197362 | ZNF786           | Intima                               | Intracellular protein           |
| ENSG00000164171 | XCR1             | Intima                               | Membrane protein                |

Two hundred and twenty-nine proteins expressed within the *tunica intima* by tissue microarray (Purple, Fig. 3A). These antigens were further categorized by their subcellular location in Fig. 3B.
